# Supplementary figures and images for: Copper-catalyzed oxidative cross-dehydrogenative coupling of 2H-chromenes and terminal alkynes
Source: Royal Society of Chemistry journal article supplement (doi:10.1039/c8ob00949j), 2018-01-01

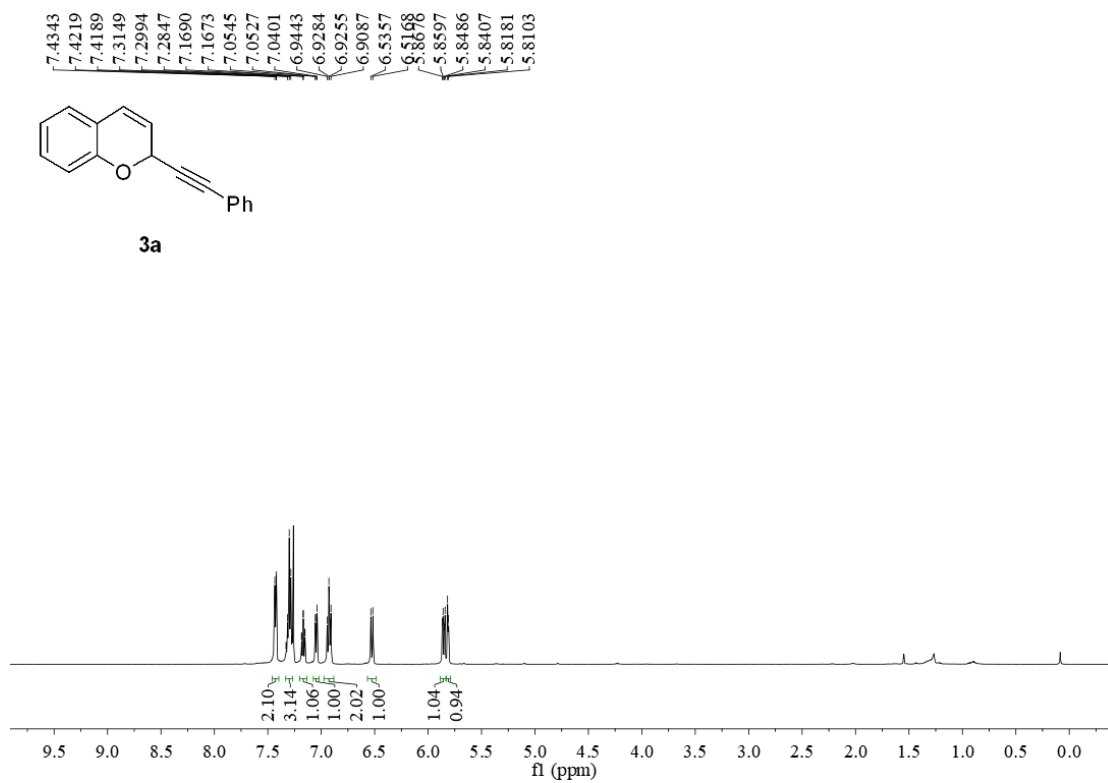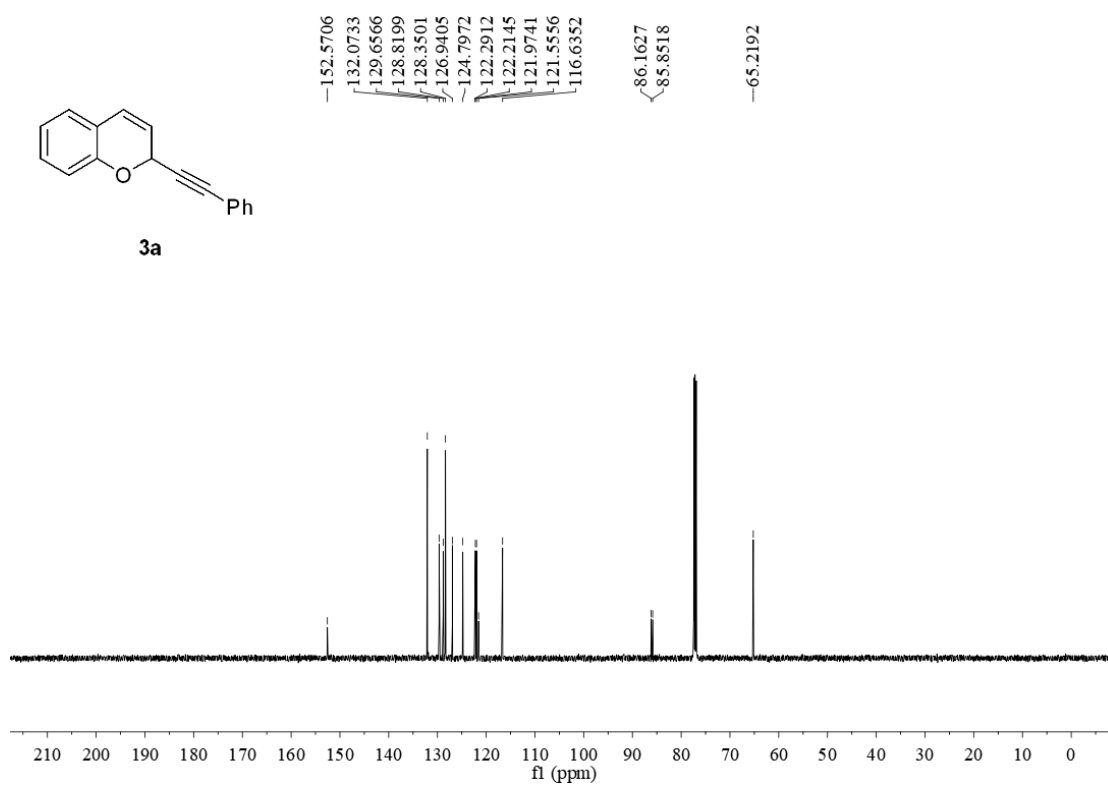

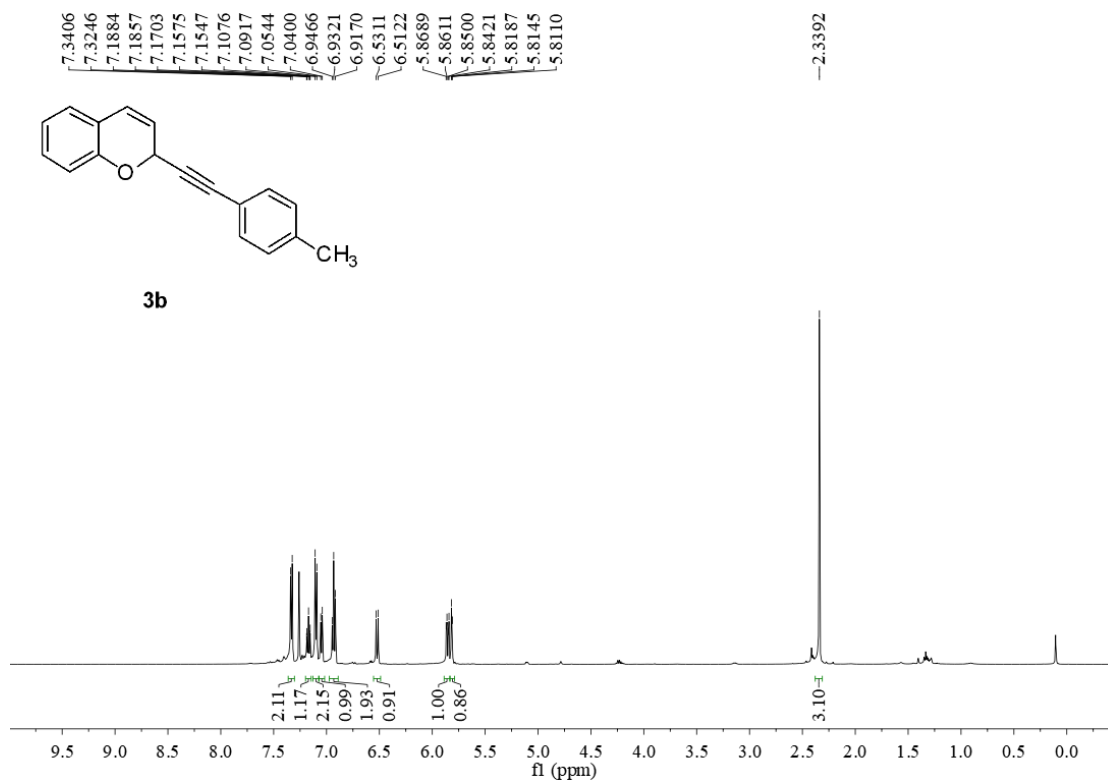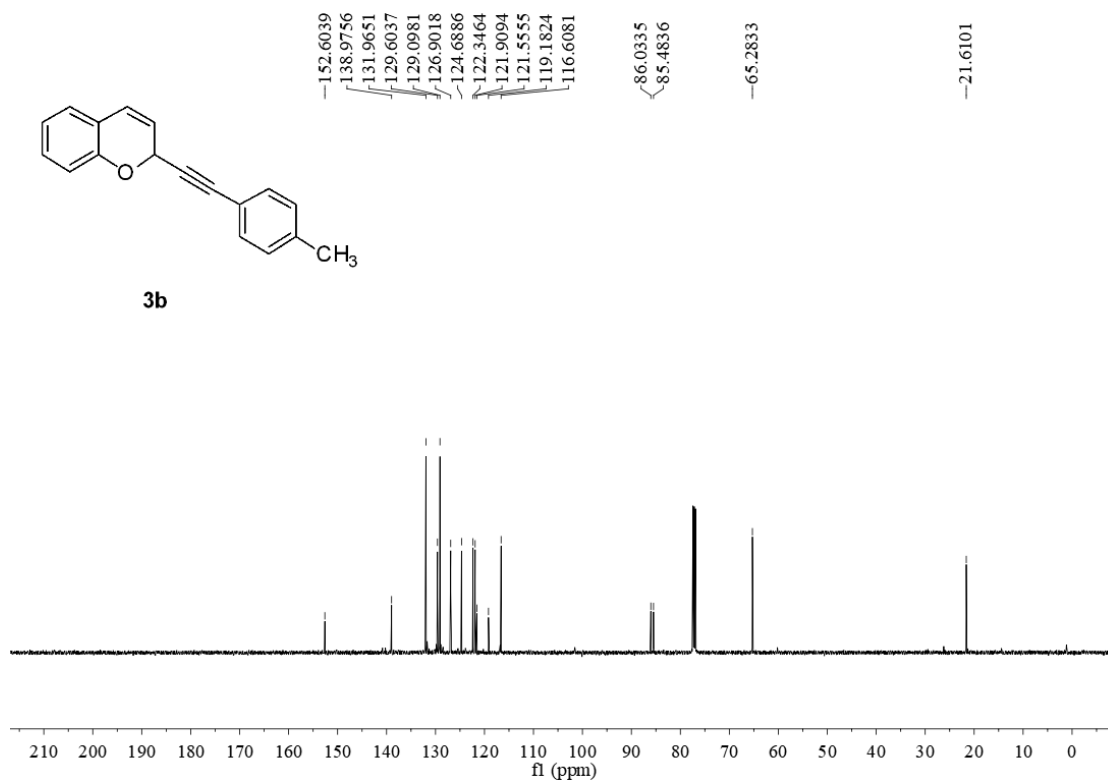

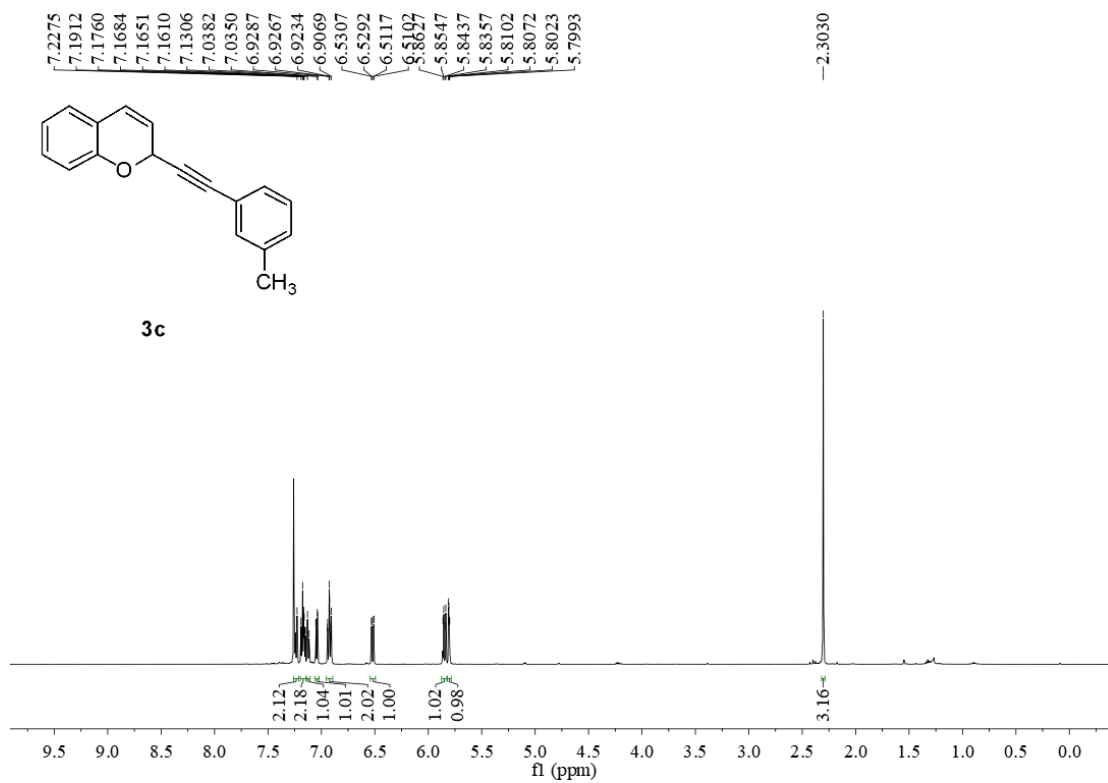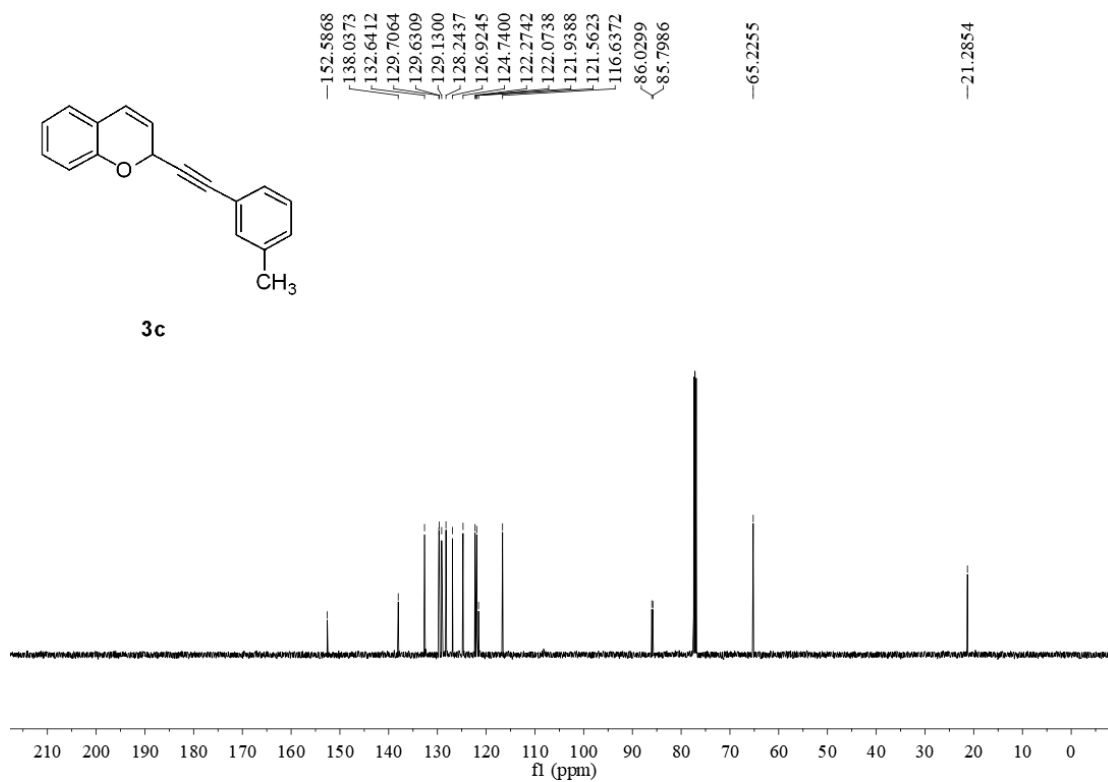

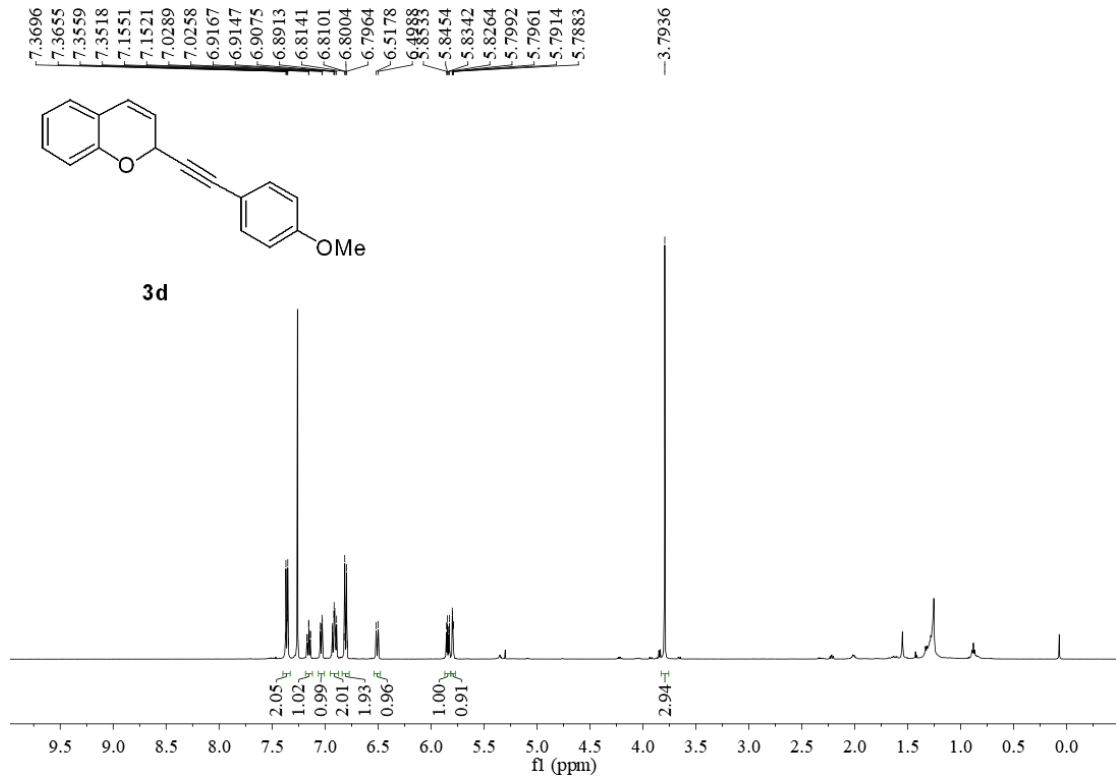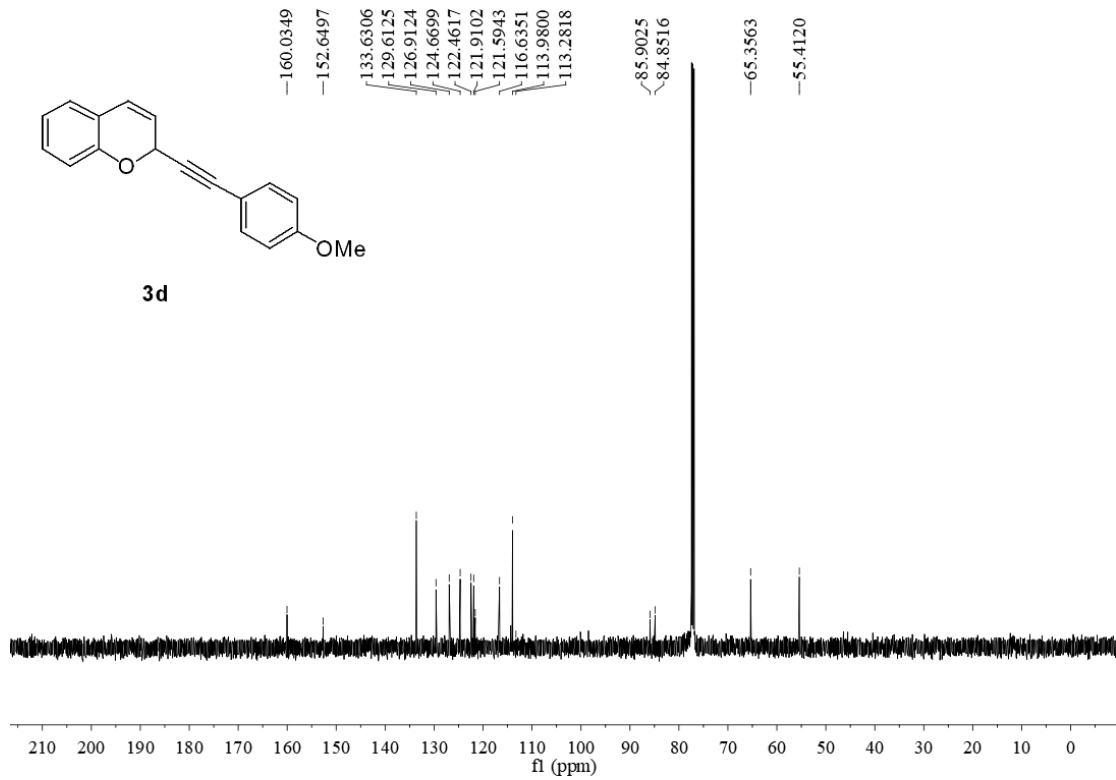

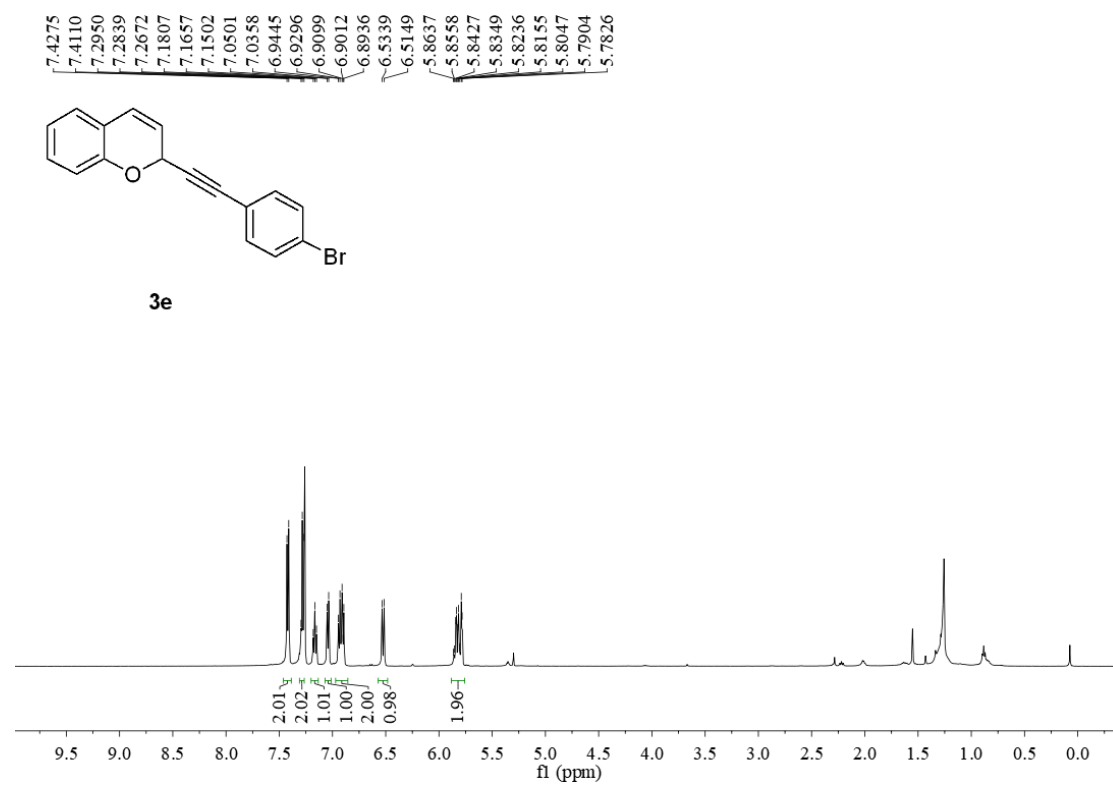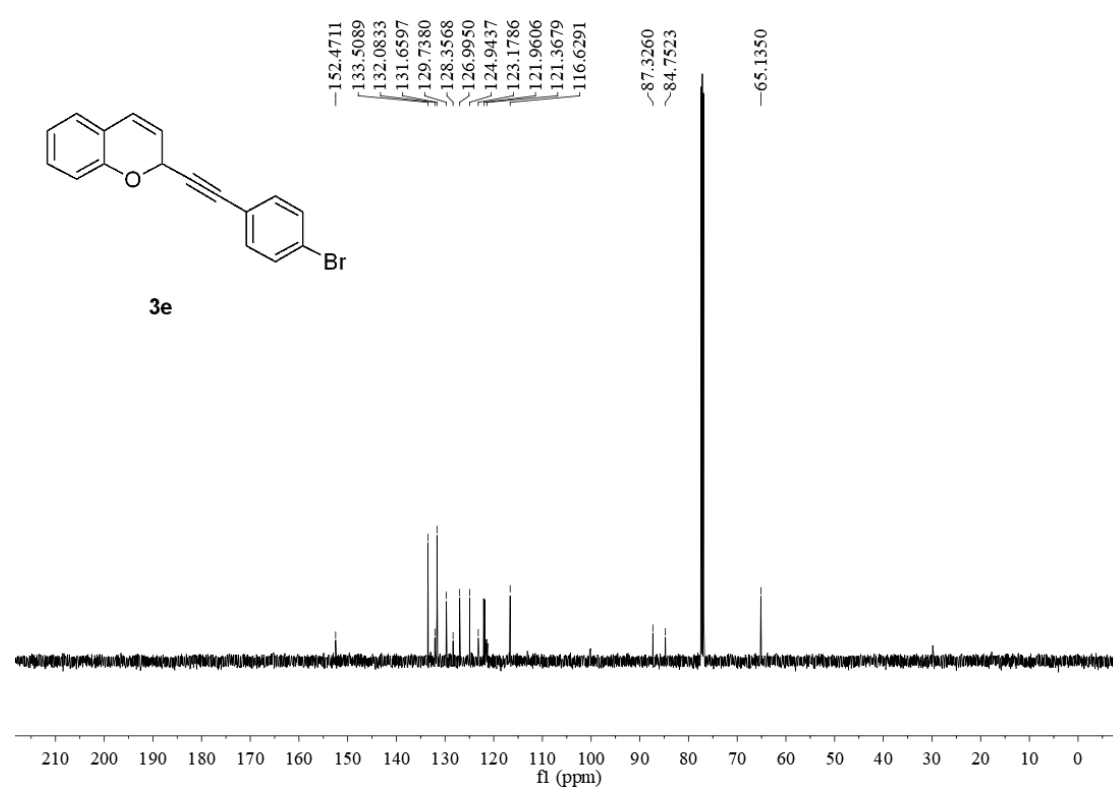

7.3464  
7.3427  
7.3331  
7.3293  
7.2603  
7.2564  
7.2476  
7.2431  
7.1652  
7.1623  
7.0314  
7.0283  
6.9264  
6.9245  
6.9144  
6.8983  
6.5278  
6.5090  
5.8389  
5.8309  
5.8201  
5.8120  
5.7968  
5.7941  
5.7887  
5.7861

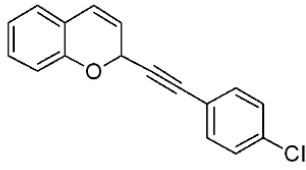

**3f**

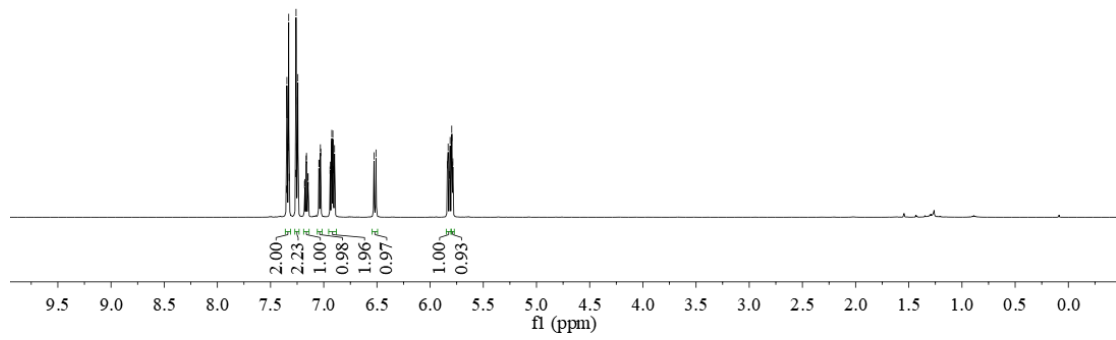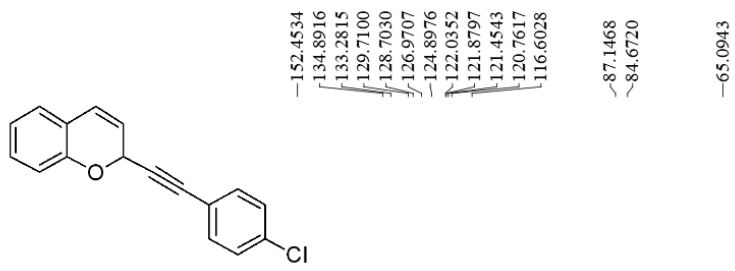

**3f**

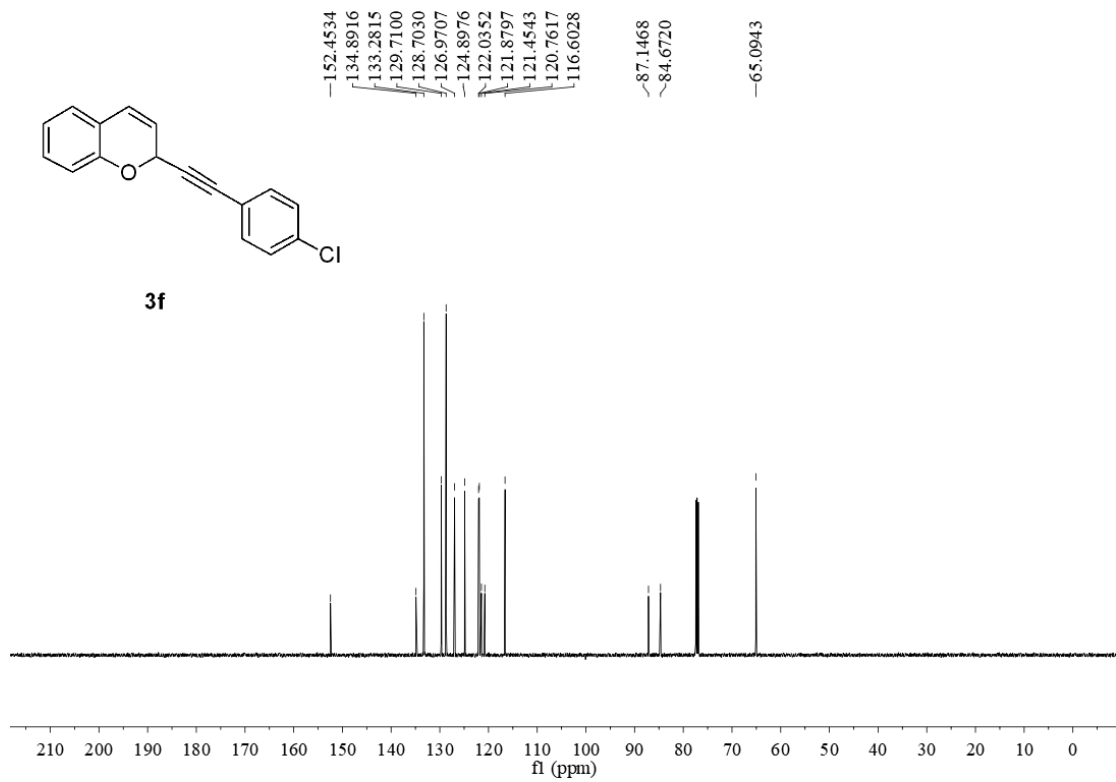

7.4211  
7.4103  
7.4077  
7.4033  
7.3926  
7.1731  
7.1701  
7.0423  
7.0391  
6.9997  
6.9823  
6.9648  
6.9348  
6.9327  
6.9229  
6.9068  
6.5370  
6.5179  
5.8538  
5.8458  
5.8348  
5.8268  
5.8035  
5.8006  
5.7955  
5.7926

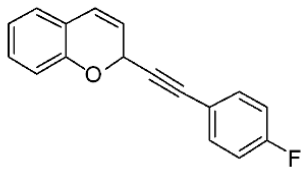

**3g**

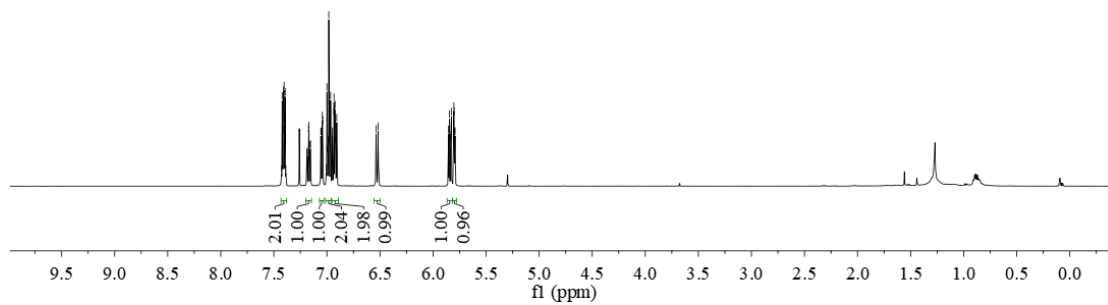

163.8370  
161.8485  
152.5043  
134.0047  
129.6891  
126.9591  
124.8399  
122.0096  
121.4981  
118.3731  
116.6133  
115.6585  
85.9174  
84.7745  
65.1300

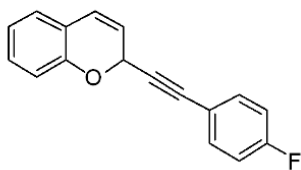

**3g**

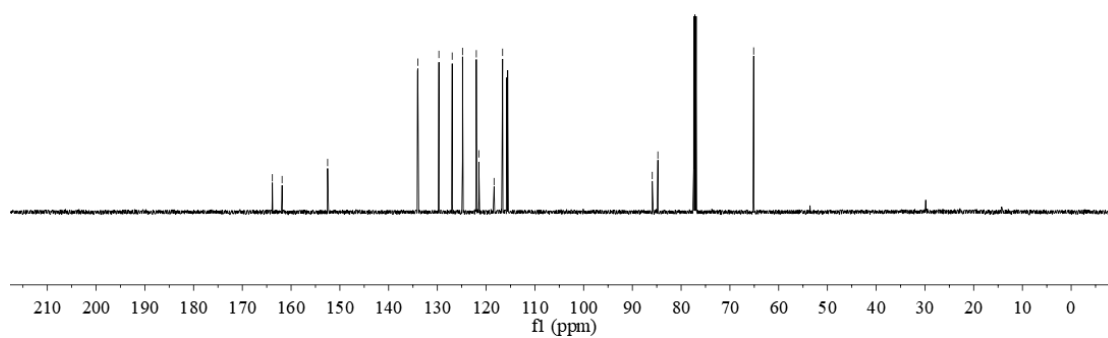

7.2707  
7.2550  
7.2435  
7.2390  
7.2275  
7.2086  
7.2063  
7.2040  
7.1908  
7.1881  
7.1750  
7.1721  
7.1597  
7.1565  
7.1301  
7.1273  
7.1252  
7.1226  
7.1114  
7.1085  
7.1064  
7.1038  
7.0577  
7.0547  
7.0428  
7.0397  
7.0344  
7.0323  
7.0226  
7.0206  
7.0175  
7.0061  
7.0037  
7.0008  
6.9518  
6.9498  
6.9369  
6.9349  
6.9201  
6.9041  
6.5432  
6.5243  
5.8513  
5.8432  
5.8324  
5.8243  
5.8041  
5.8013  
5.7960  
5.7933

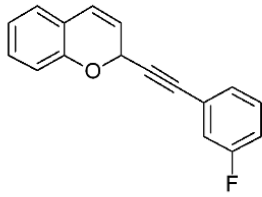

3h

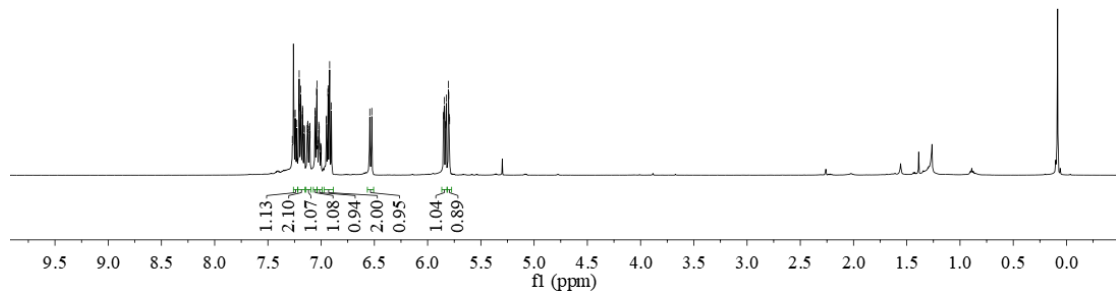

163.3255  
161.3644  
152.4442  
129.9941  
129.7391  
127.9370  
126.9945  
124.9755  
124.1128  
121.9738  
121.4758  
118.8611  
116.6329  
116.2172  
87.0955  
84.5313  
65.0432

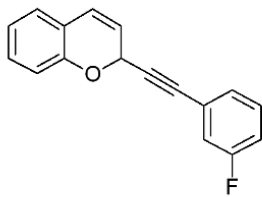

3h

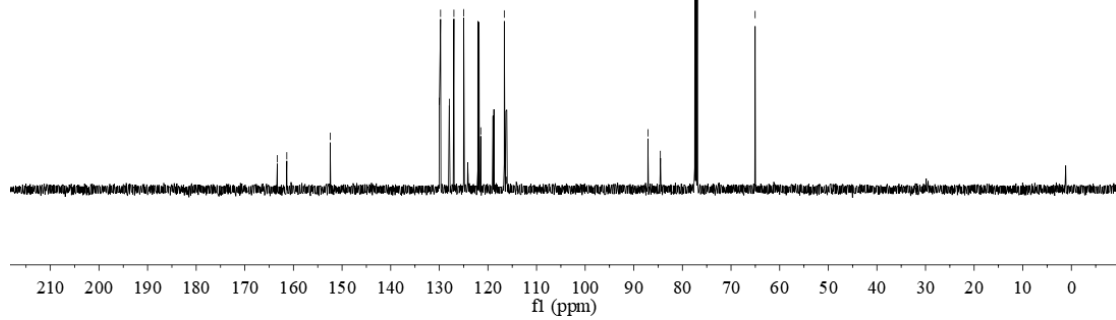



7.5573  
7.5403  
7.5263  
7.5094  
7.1865  
7.1843  
7.1714  
7.0673  
7.0648  
7.0525  
7.0500  
6.9620  
6.9467  
6.9340  
6.9184  
6.5586  
6.5403  
5.8629  
5.8548  
5.8445  
5.8364  
5.8297  
5.8203

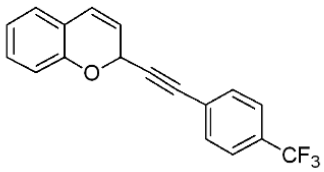

**3i**

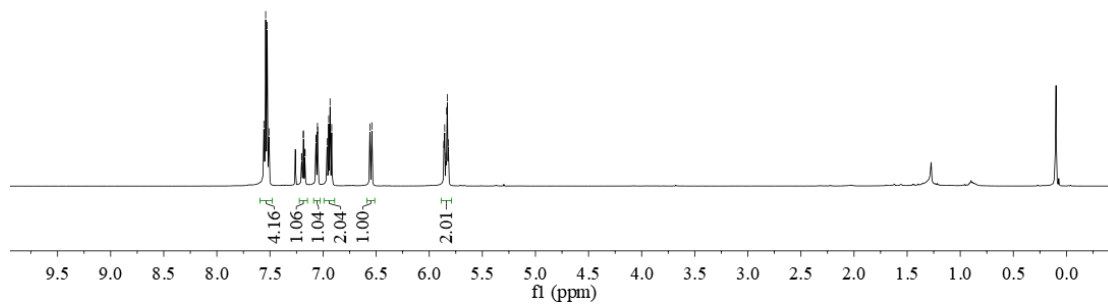

152.3986  
132.2878  
130.5151  
129.7953  
127.0339  
126.1243  
125.3058  
125.0916  
122.8596  
122.1404  
121.6181  
121.4355  
116.6304  
88.5975  
84.3545  
65.0121

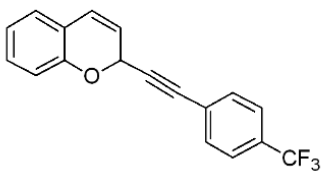

**3i**

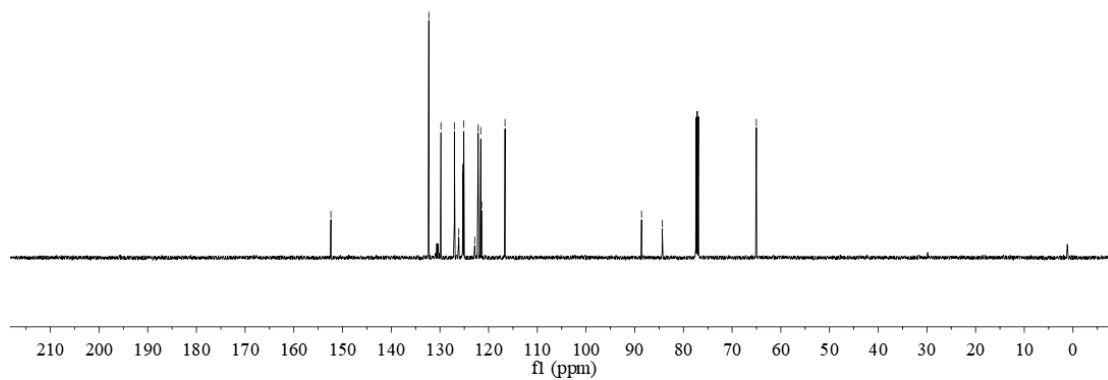

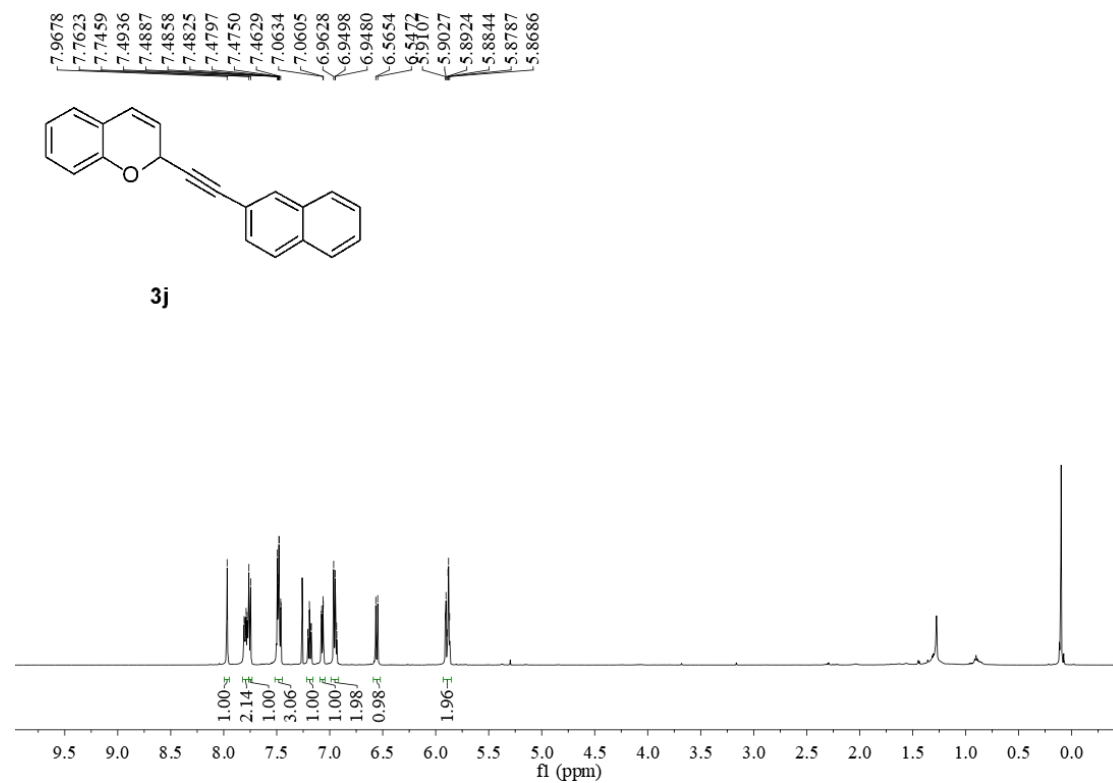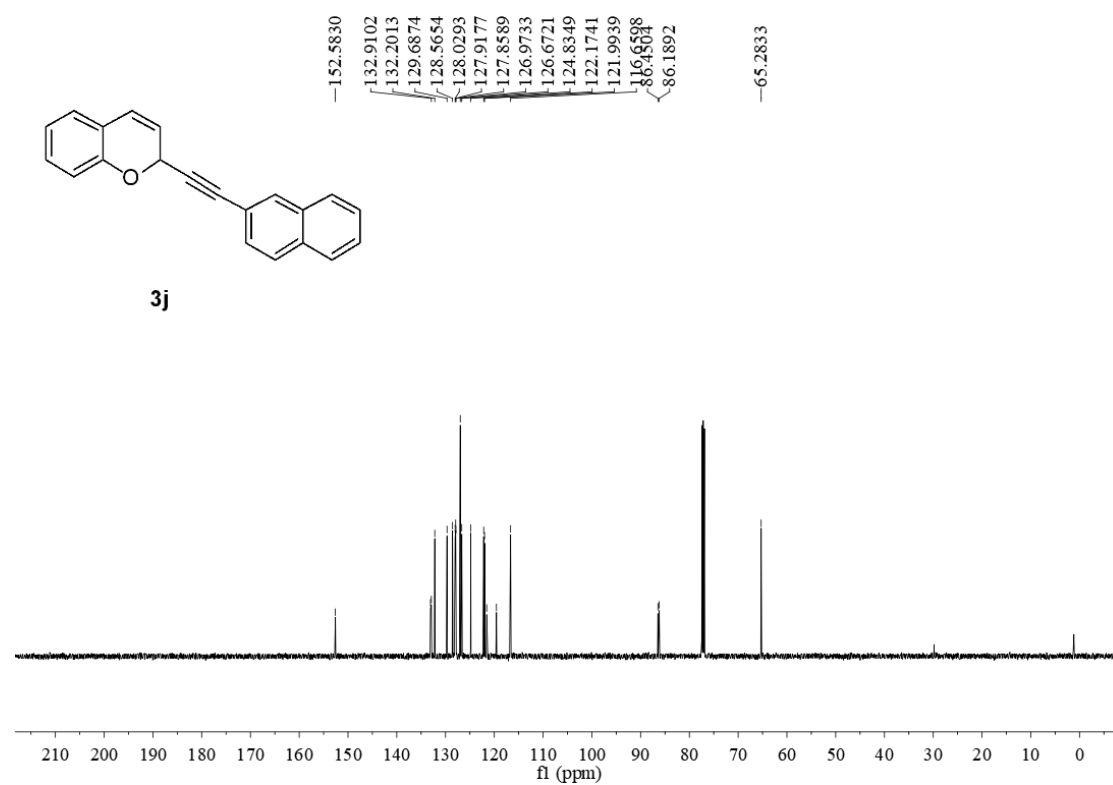

7.2598  
7.2508  
7.2258  
7.2188  
7.1715  
7.1694  
7.0574  
7.0549  
7.0427  
7.0401  
6.9589  
6.9488  
6.9413  
6.9338  
6.9185  
6.9022  
6.5383  
6.5274  
5.8476  
5.8394  
5.8297  
5.8258  
5.8178

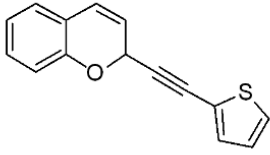

3k

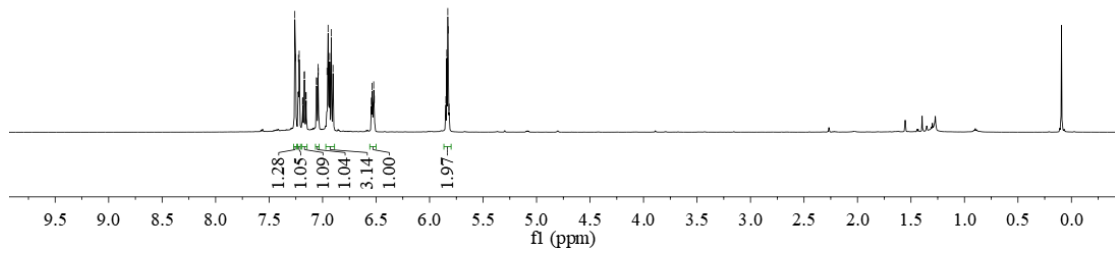

152.4597  
133.1207  
129.6990  
127.9231  
127.0474  
126.9709  
124.9402  
122.1623  
122.0083  
121.7071  
121.4386  
116.6292  
90.0454  
79.1684  
65.2542

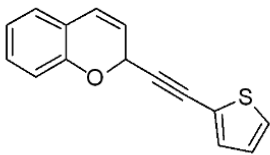

3k

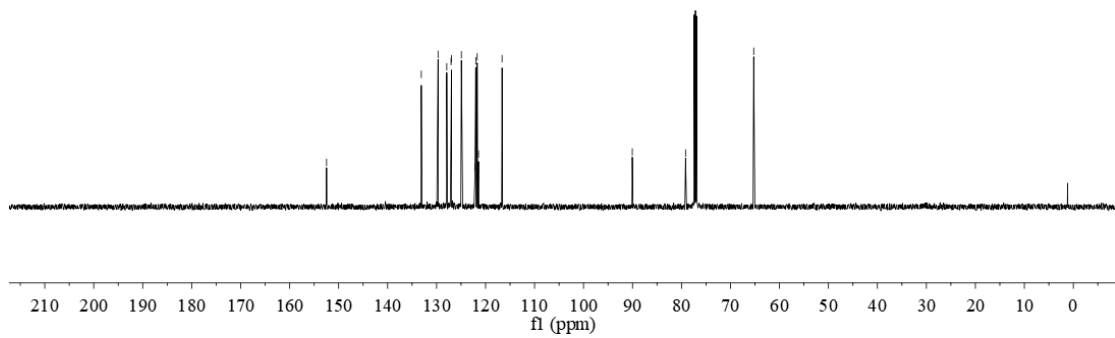

7.4665  
7.4647  
7.4607  
7.4589  
7.2412  
7.2352  
7.2312  
7.2252  
7.1036  
7.1017  
7.0936  
7.0917  
7.0405  
7.0376  
6.9321  
6.9305  
6.9232  
6.9070  
5.8538  
5.8459  
5.8349  
5.8269  
5.8054  
5.8027  
5.7975  
5.7948

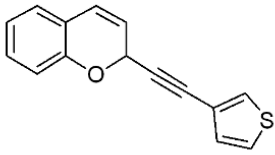

31

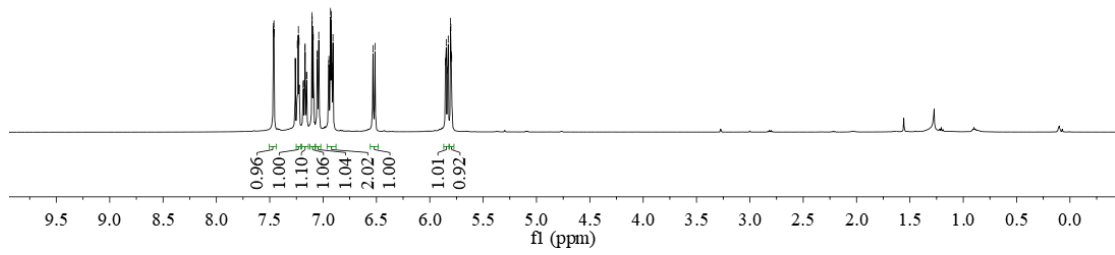

152.5199  
130.0937  
129.8886  
129.6504  
126.9346  
125.3975  
124.7758  
122.0869  
121.9617  
121.4957  
121.3009  
116.6198  
85.8297  
81.0219  
65.2041

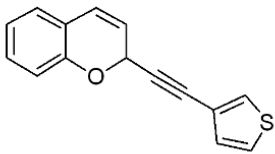

31

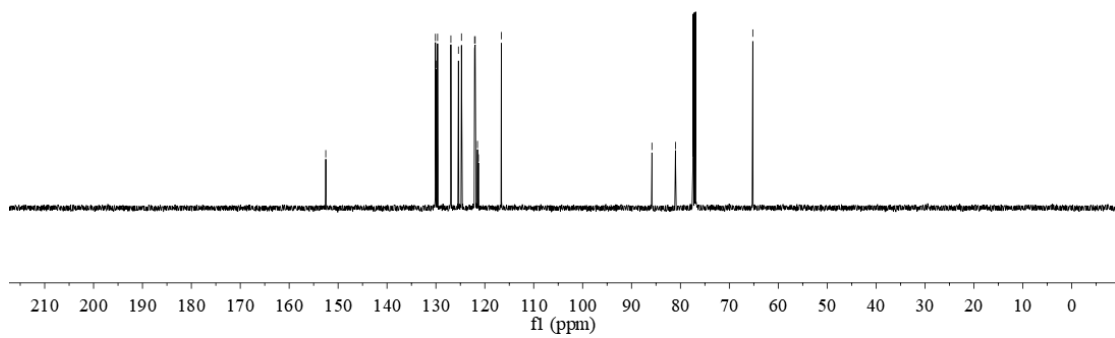

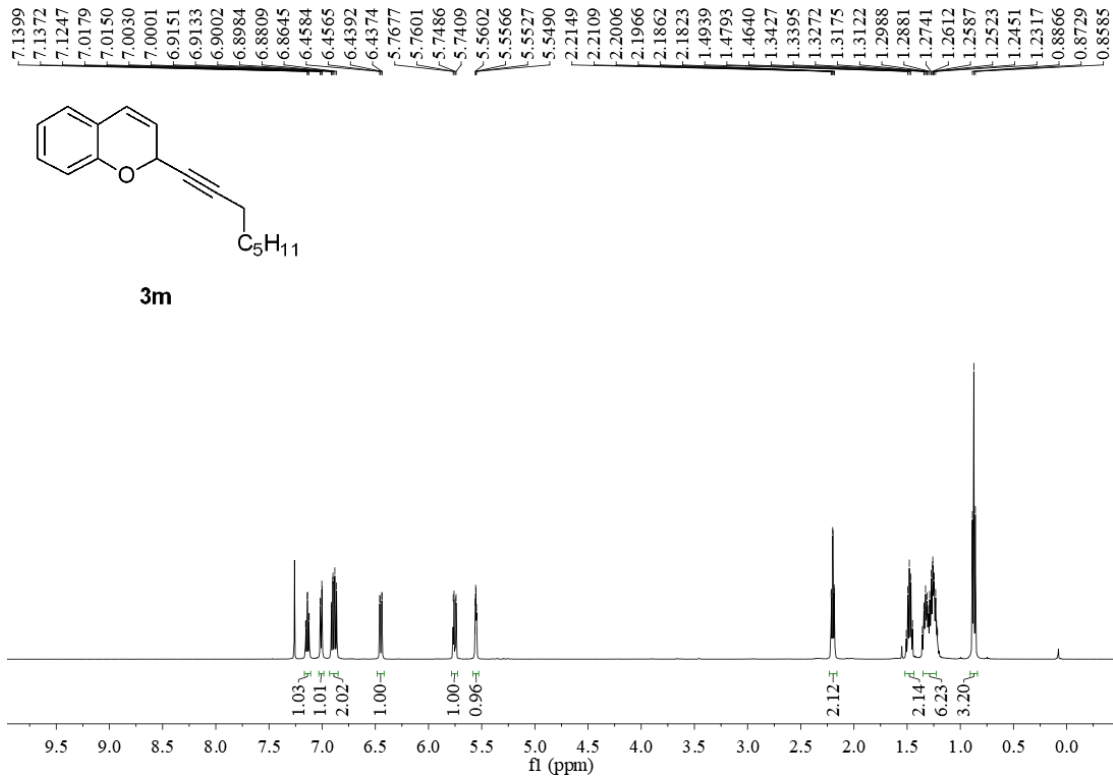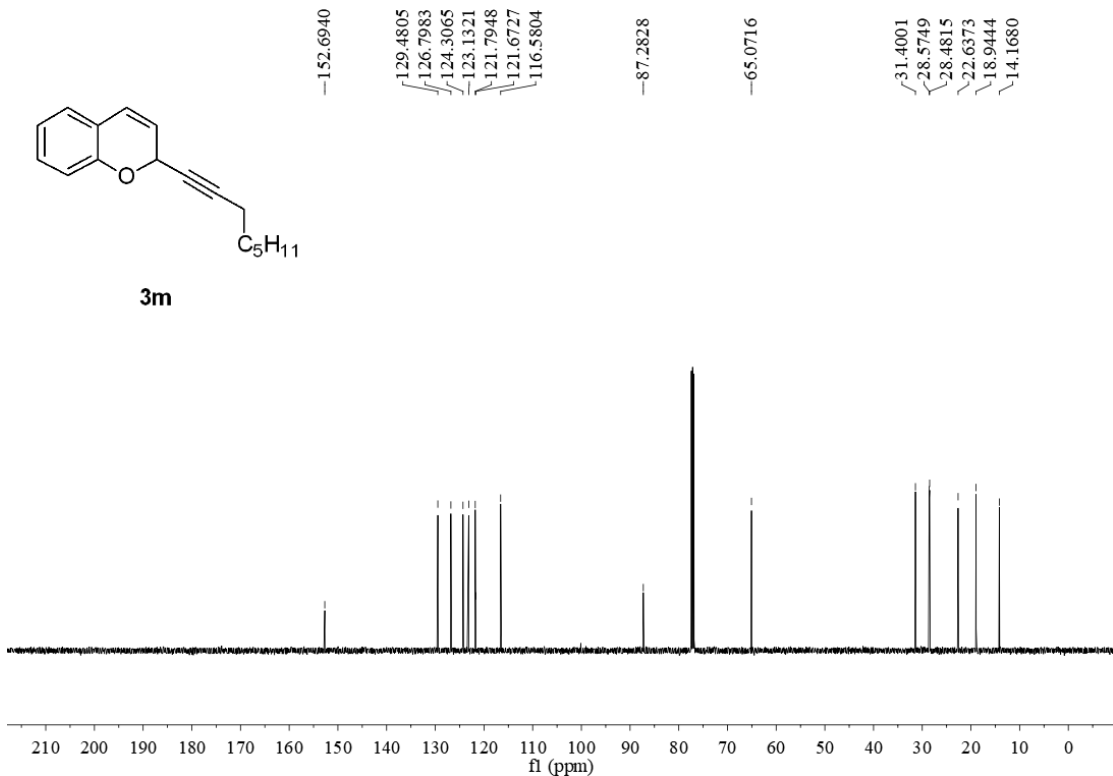

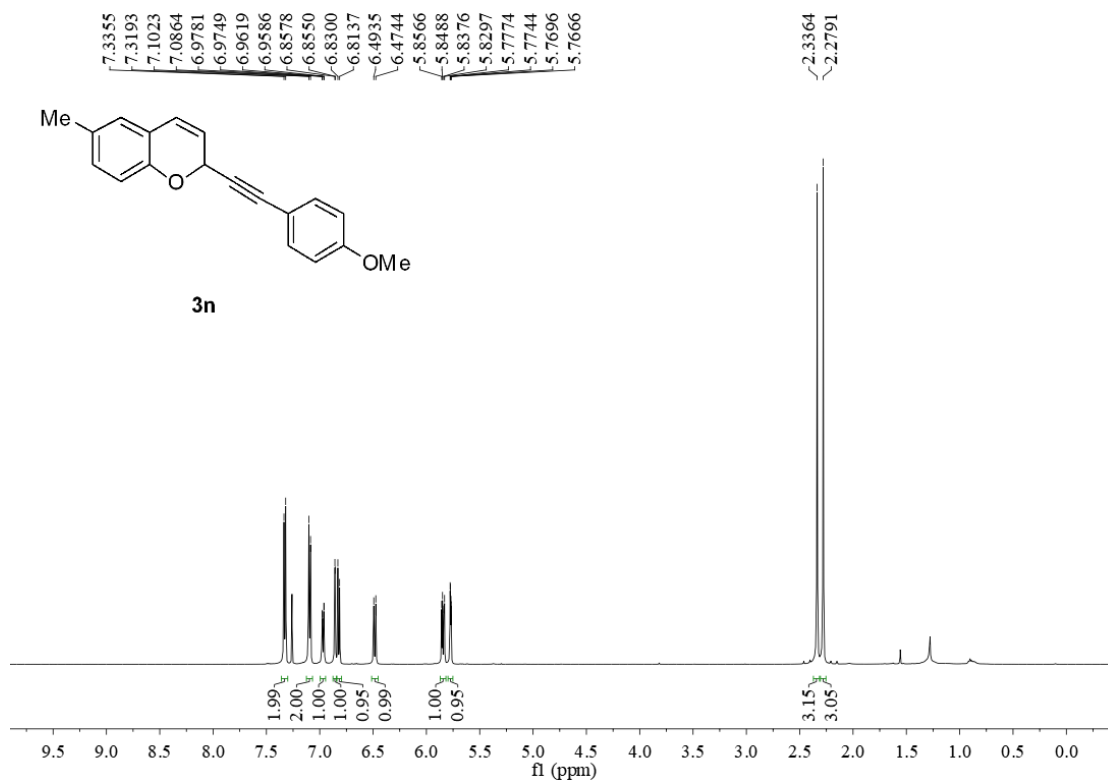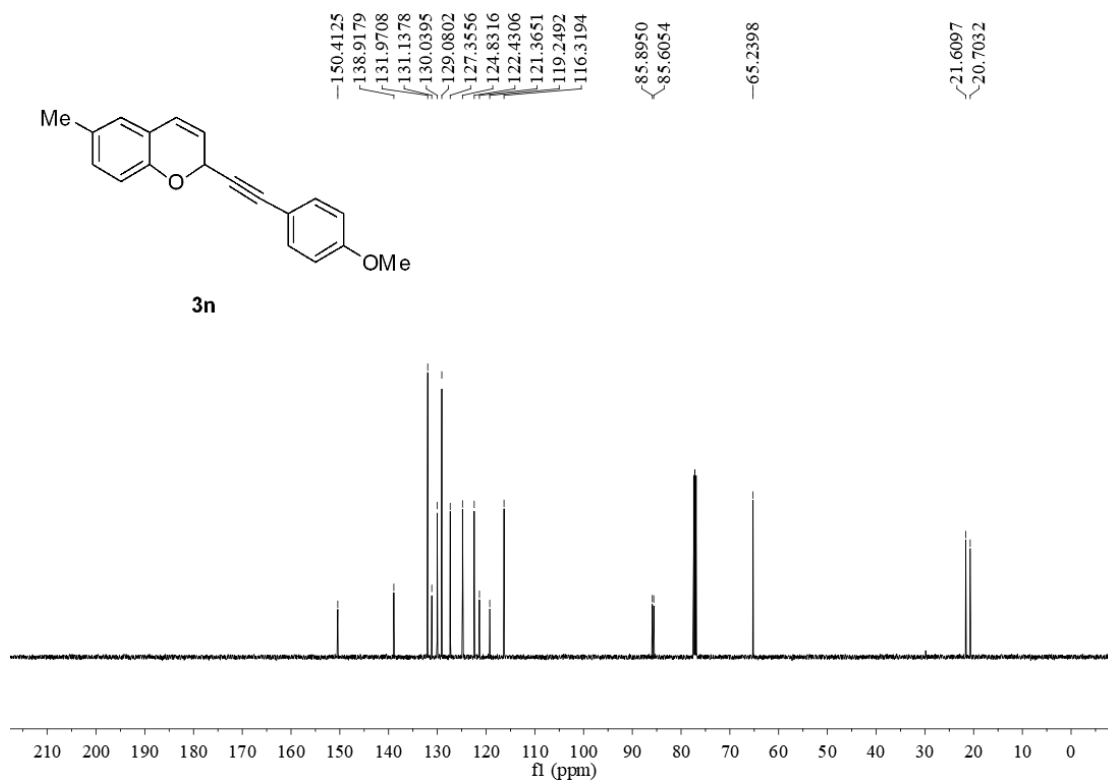

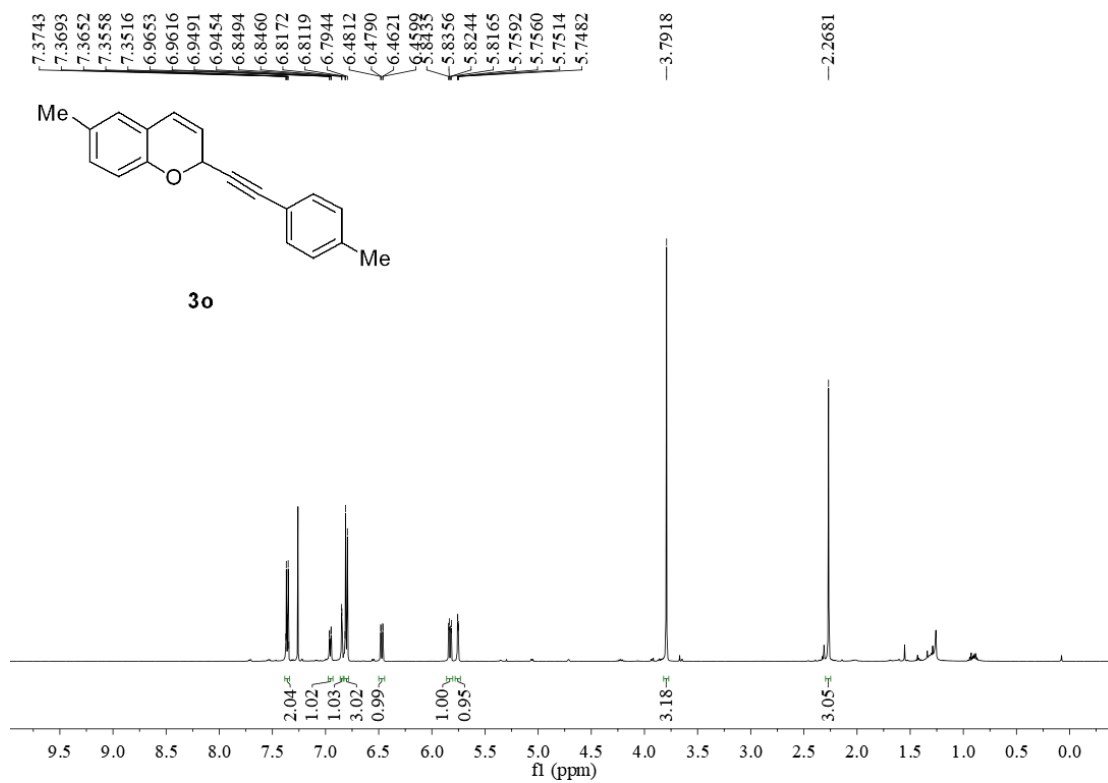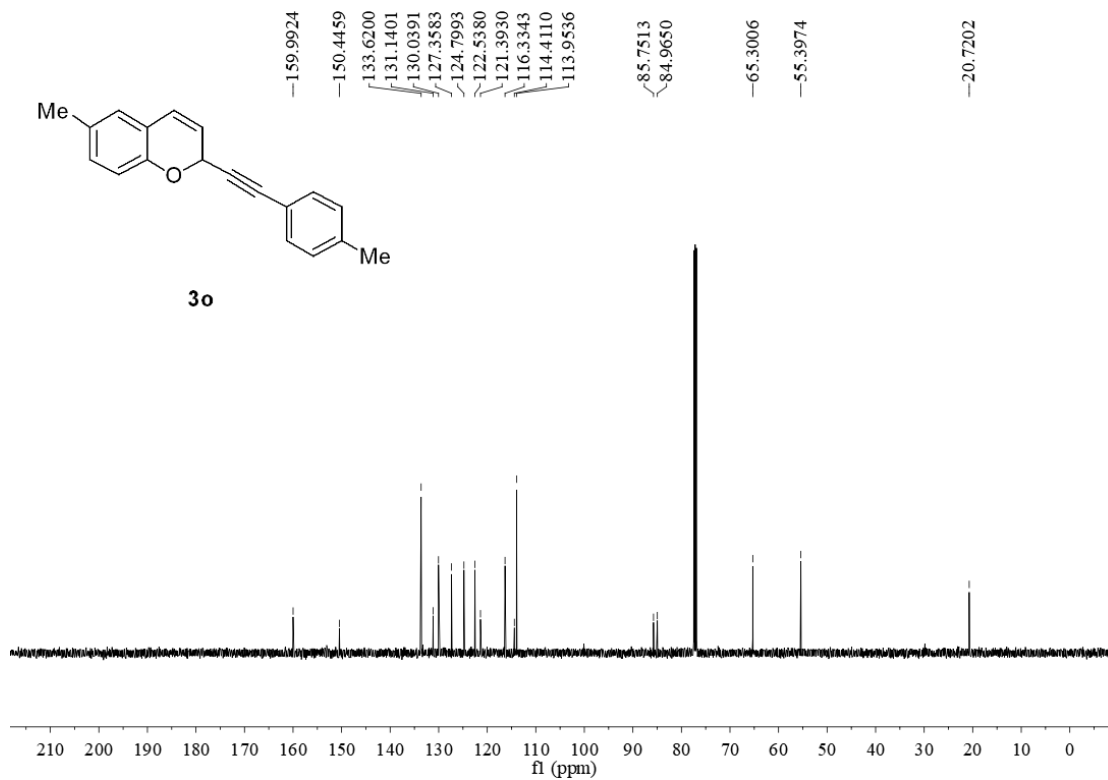

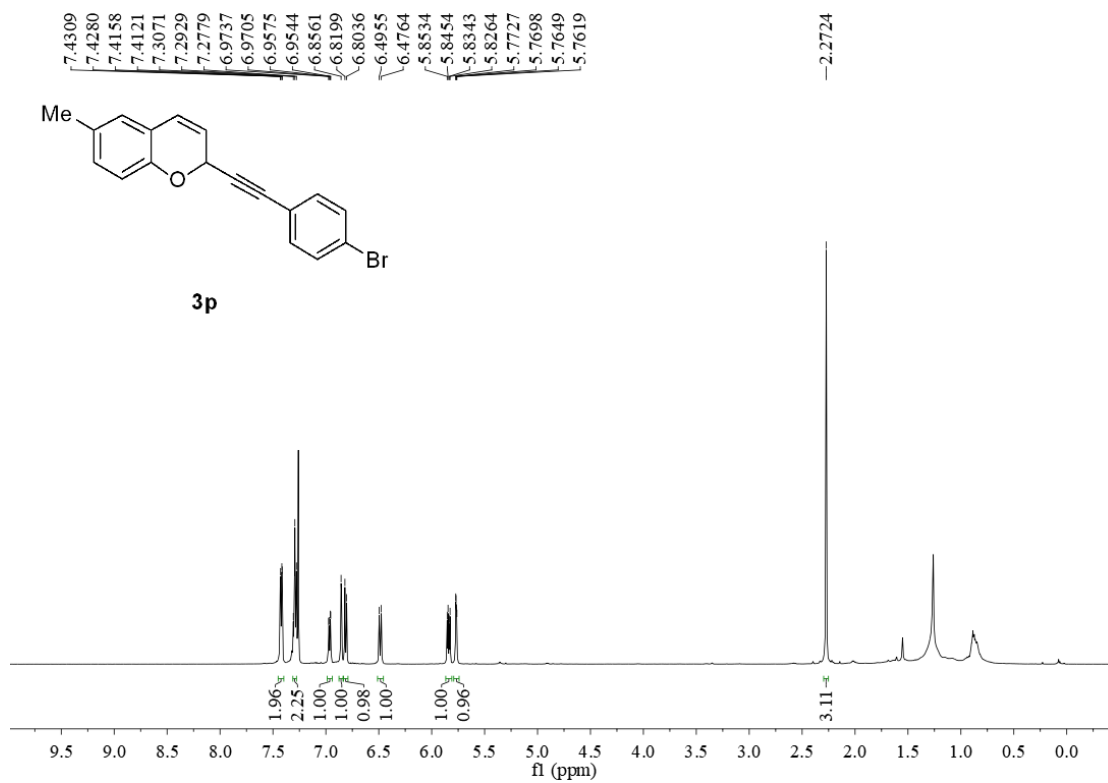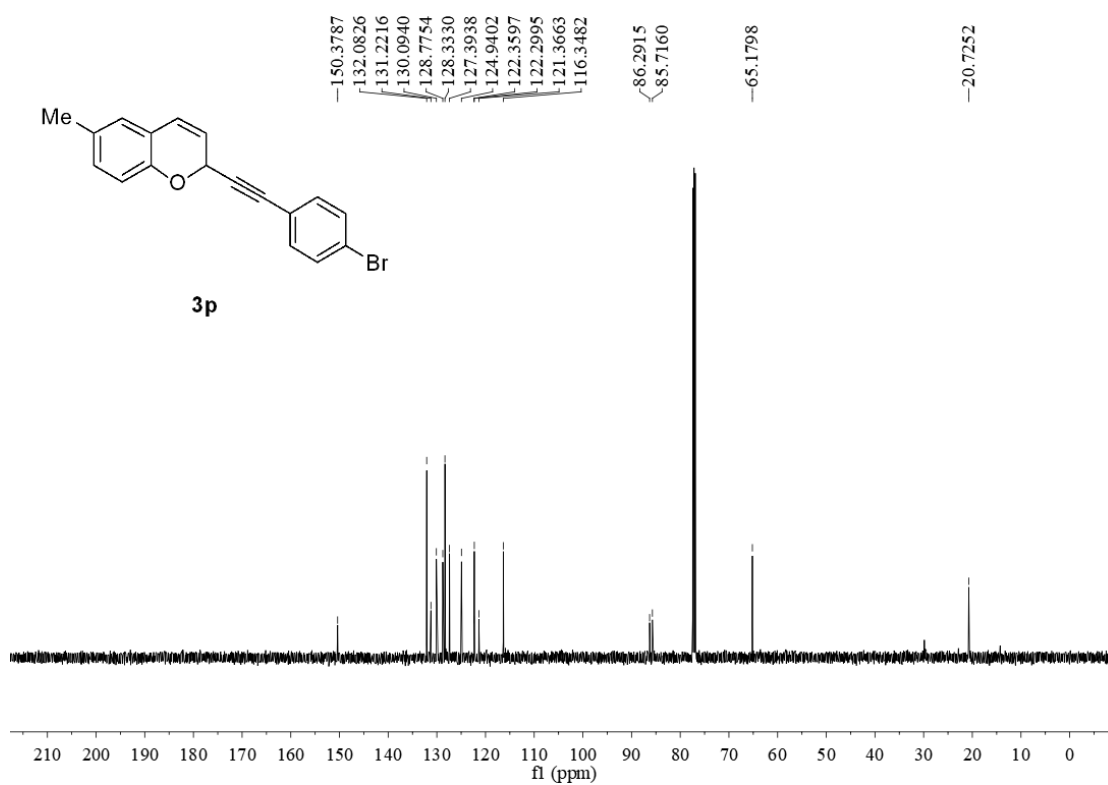



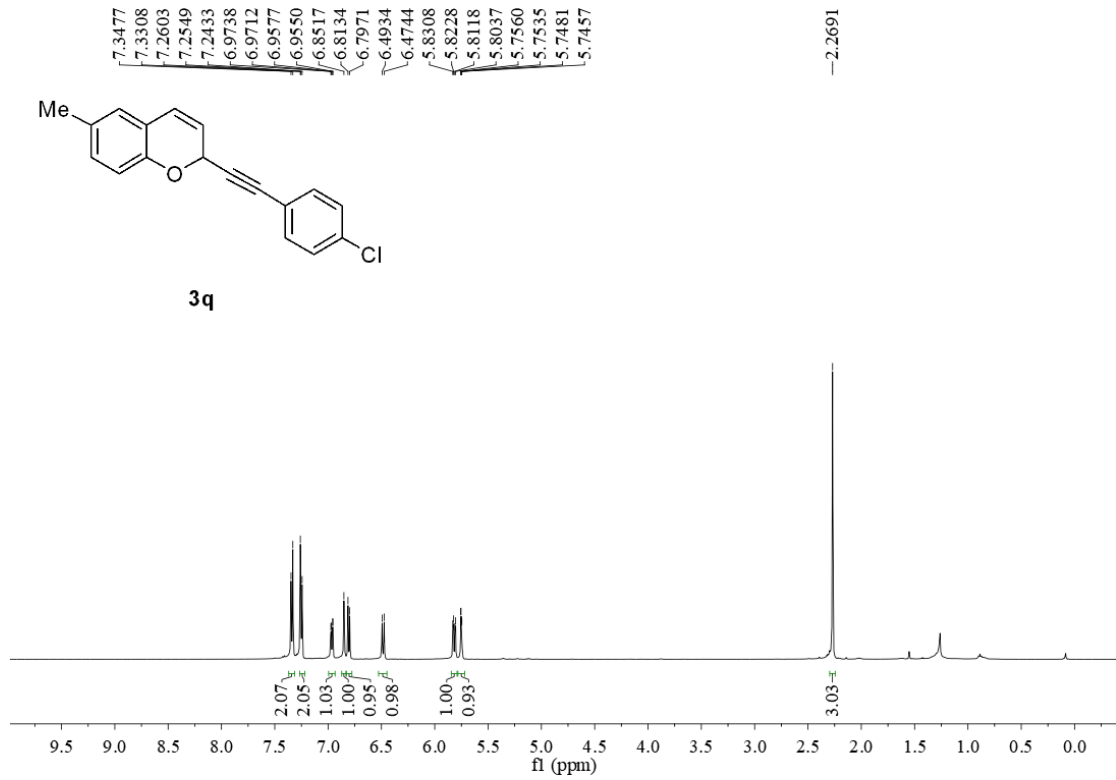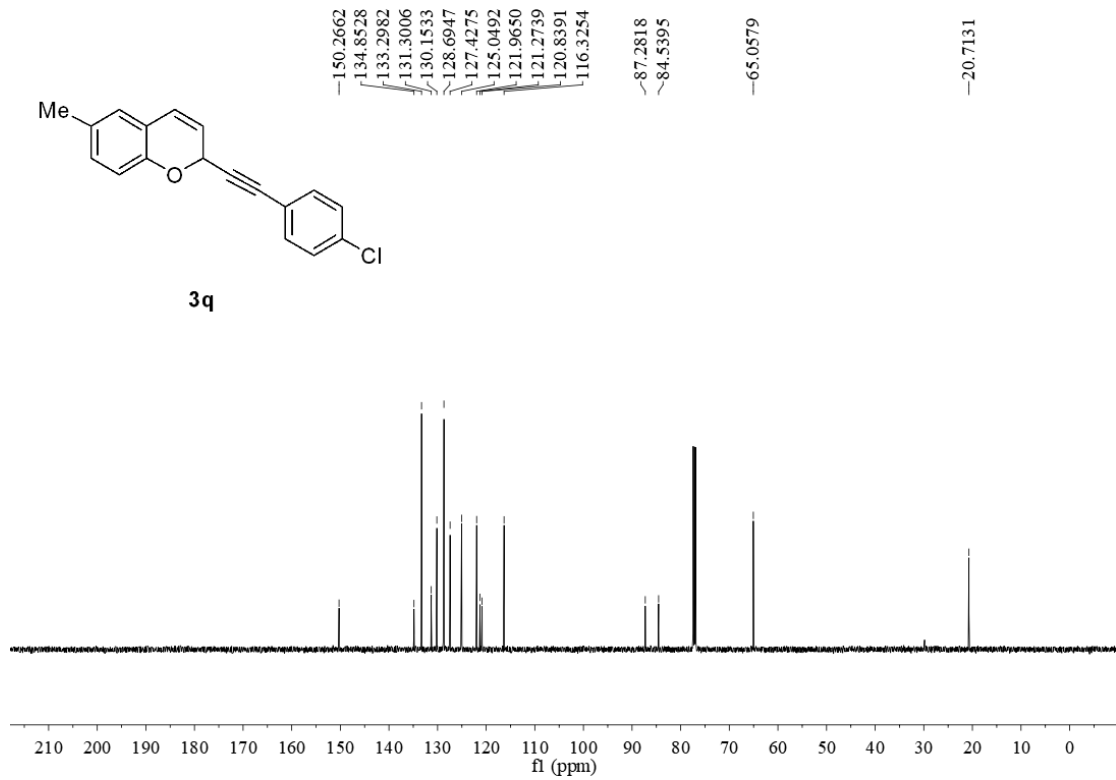

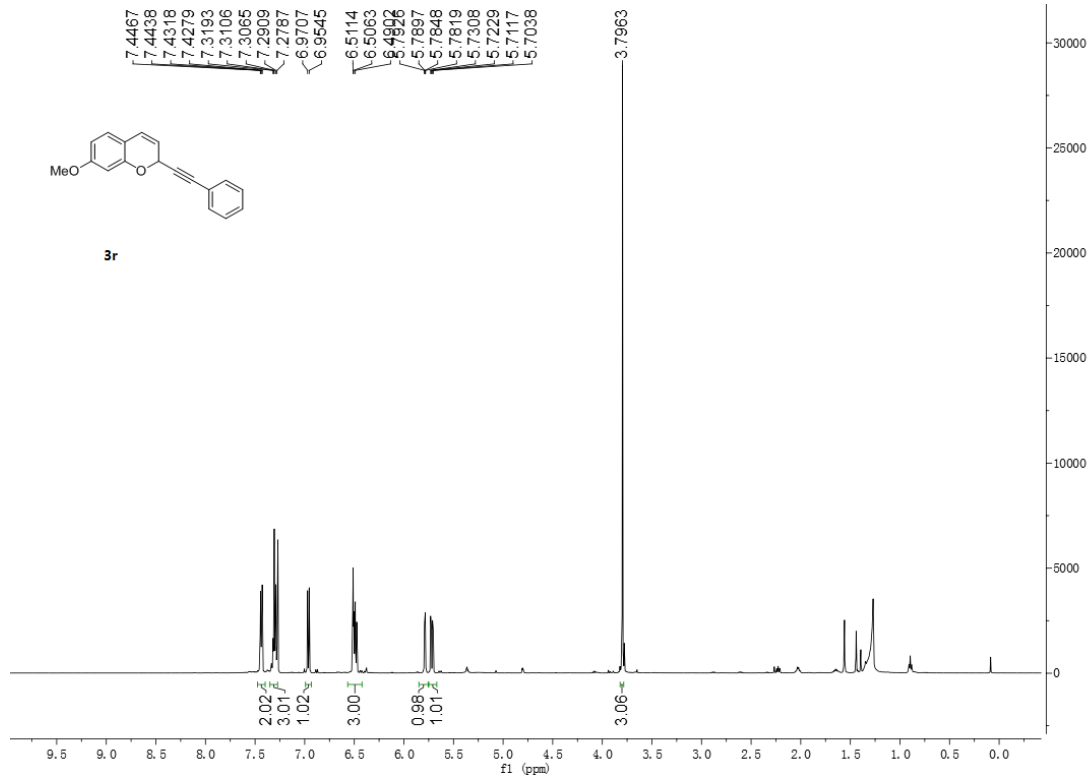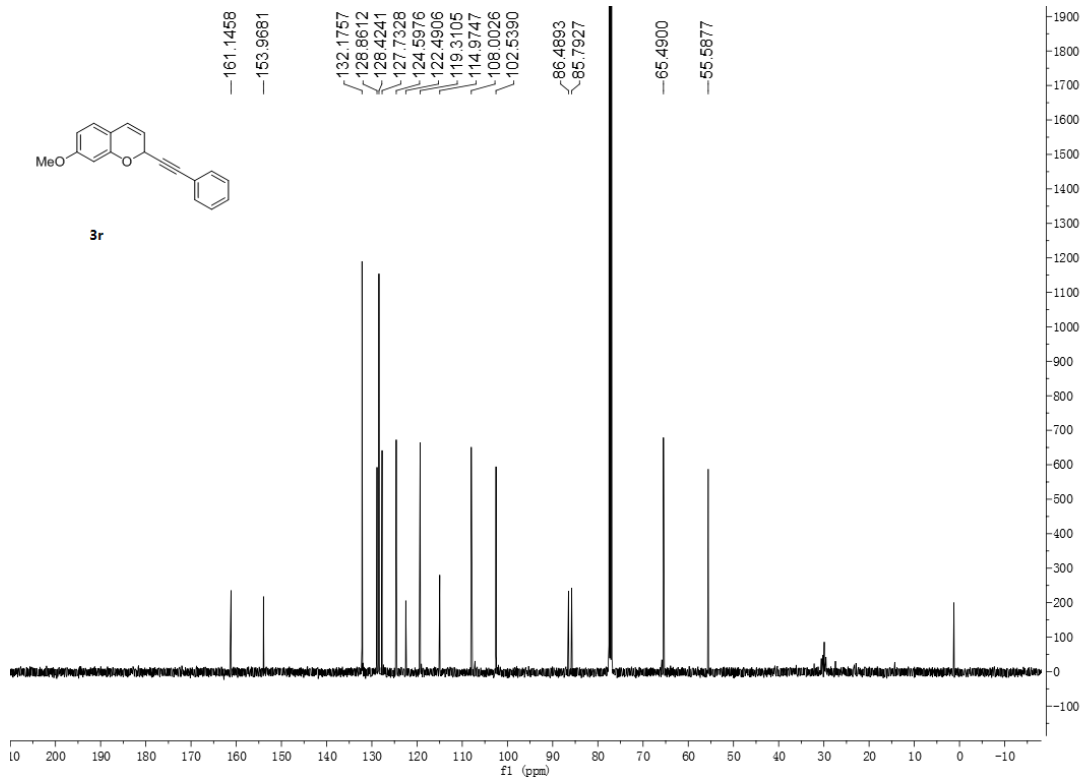

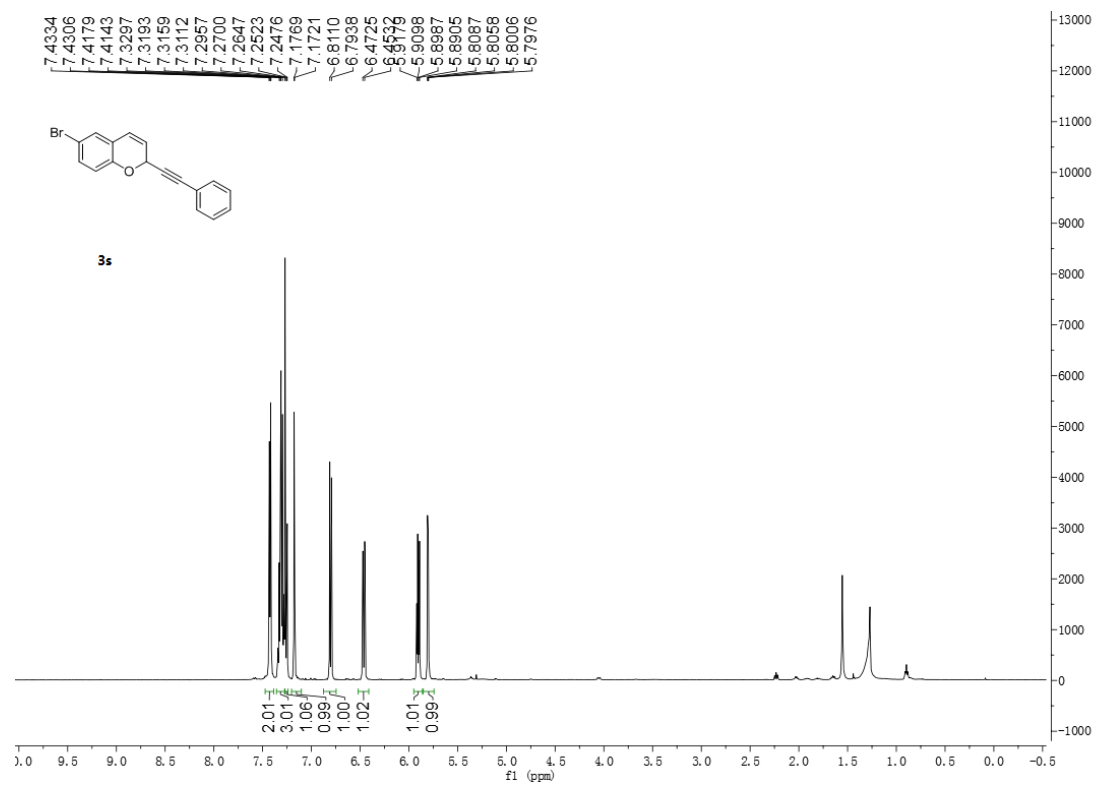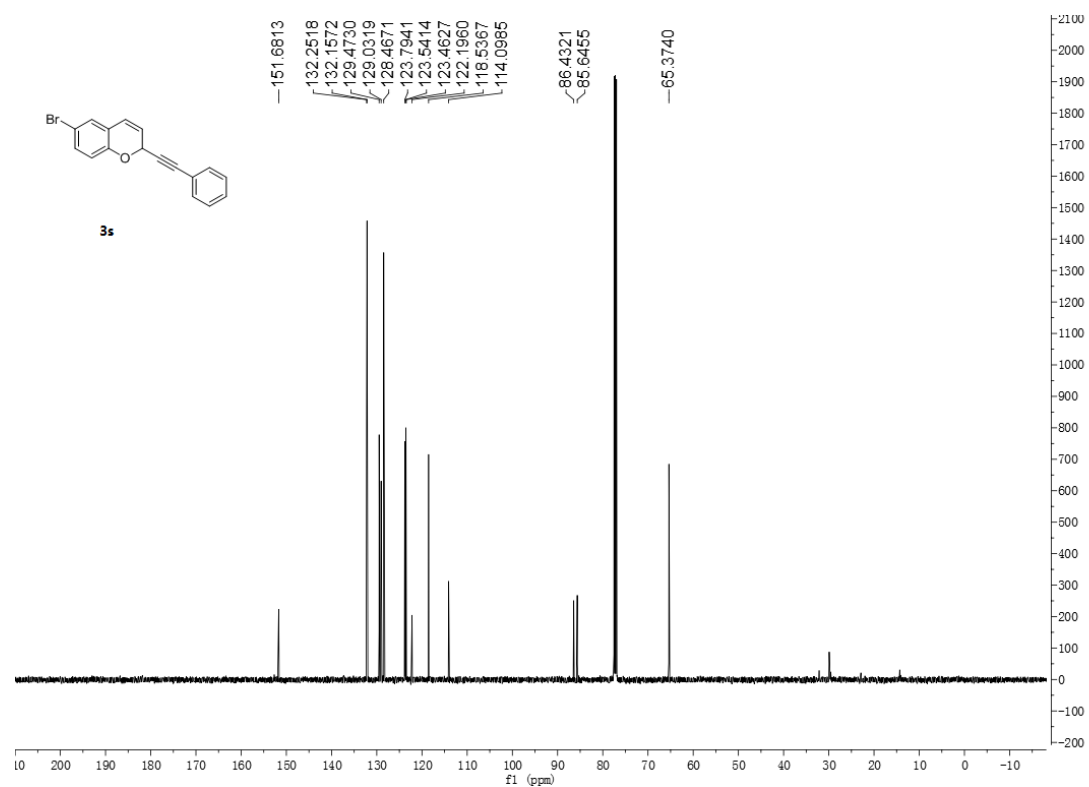

Supplement: c8ob00949j1.pdf [file c8ob00949j1.pdf]
